# Supplementary material
Source: MDPI journal article supplement (https://www.mdpi.com/2304-6740/3/2/219)
Supplement: s1 [file s1]

## Supplementary Information

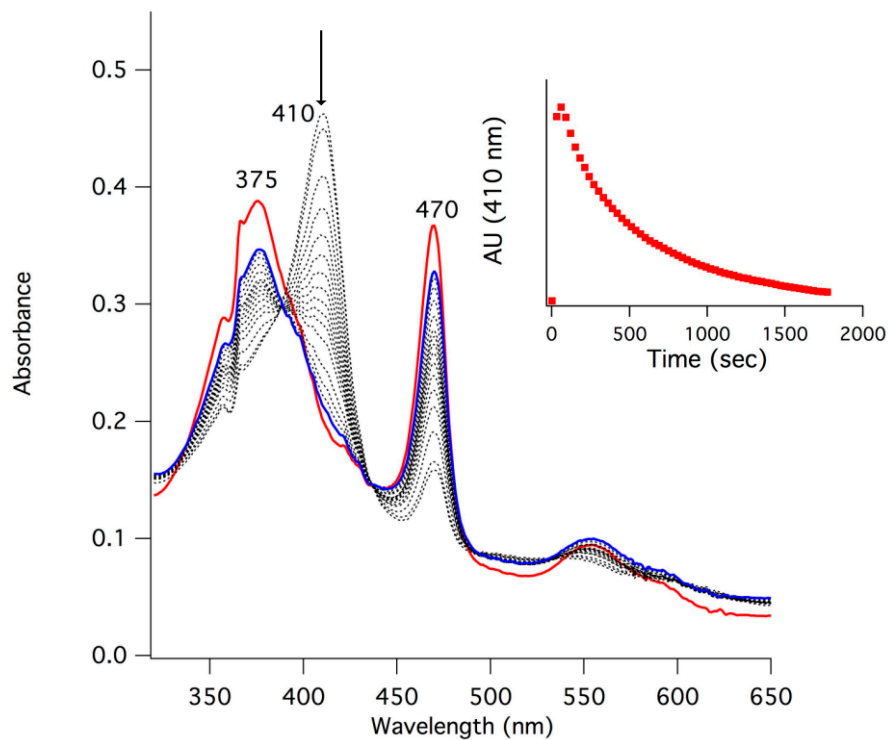

**Figure S1.** Reaction of manganese-substituted myoglobin (red) with *m*-chloroperbenzoic acid (9.84  $\mu$ M and 10  $\mu$ M, respectively) showing the formation of the intermediate (dotted line) with absorption maximum at 410 nm and decay to the starting Mn-Mb (blue). Inset highlights the formation of the intermediate and decay to Mn-Mb over time.

© 2015 by the authors; licensee MDPI, Basel, Switzerland. This article is an open access article distributed under the terms and conditions of the Creative Commons Attribution license (<http://creativecommons.org/licenses/by/4.0/>).
